# Supplementary material for: Reconstruction of Genome-Scale Active Metabolic Networks for 69 Human Cell Types and 16 Cancer Types Using INIT
Source: PubMed Central journal article supplement (PMC3355067; doi:10.1371/journal.pcbi.1002518), 2012-05-17
Supplement: pcbi.1002518.s004.pdf [file pcbi.1002518.s004.pdf]

**Table S2.** Investigation of the 80 genes that were present in HepatoNet1 but missing in HMR. The 80 missing genes were associated with 746 reactions in HepatoNet1, of which 597 metabolic and transport reactions were related to the sinusoidal space compartment. 117 metabolic reactions existed in HMR with different gene or no gene association and 32 (5 unique) reactions were altogether absent in HMR. KEGG reaction identifiers or Transporter Classification database identifiers (TCDB) are provided for the missing reactions.

| Color code  | Explanation                                                                                   |
|-------------|-----------------------------------------------------------------------------------------------|
| Yellow      | Liver specific sinusoidal space related reactions                                             |
| Red         | The associated reactions are missing from HMR                                                 |
| Green       | The associated reactions are present in HMR, but under the control of other gene(s)           |
| Light Green | The associated reactions are present in HMR, but with no associated genes                     |
| Brown       | The associated transport reactions are missing from HMR                                       |
| Blue        | The associated transport reactions are present in HMR, but under the control of other gene(s) |
| Light Blue  | The associated transport reactions are present in HMR, but with no associated genes           |

| Ensembl Gene ID | Score   | Color Code               |
|-----------------|---------|--------------------------|
| ENSG00000003987 | -8,0000 | Green                    |
| ENSG00000006534 | 3,1604  | Green                    |
| ENSG00000012660 | 15,0000 | Green                    |
| ENSG00000021488 | 0,0205  | Yellow                   |
| ENSG00000054148 | 15,0000 | Green                    |
| ENSG00000054179 | 15,0000 | Green                    |
| ENSG00000063601 | 10,0000 | Green                    |
| ENSG00000072778 | 15,0000 | Green                    |
| ENSG00000087053 | 0,7663  | Green                    |
| ENSG00000099797 | 15,0000 | Red<br>KEGG ID:R07765    |
| ENSG00000100075 | 15,0000 | Brown<br>TCDB:2.A.29.7.2 |
| ENSG00000101986 | 4,4575  | Green                    |
| ENSG00000102125 | 0,0232  | Green                    |
| ENSG00000103064 | 0,8452  | Yellow                   |
| ENSG00000103257 | -5,4312 | Yellow                   |
| ENSG00000108528 | 15,0000 | Green                    |
| ENSG00000110911 | 1,1849  | Yellow                   |
| ENSG00000111775 | 0,0000  | Green                    |
| ENSG00000112303 | -3,9297 | Green                    |
| ENSG00000112695 | 0,8719  | Green                    |
| ENSG00000112981 | -0,8115 | Light Green              |

|                 |         |                |
|-----------------|---------|----------------|
| ENSG00000121053 | 0,2721  |                |
| ENSG00000123684 | 15,0000 |                |
| ENSG00000125454 | -0,0169 |                |
| ENSG00000125505 | 1,4716  |                |
| ENSG00000126267 | 20,0000 |                |
| ENSG00000127184 | -1,4591 |                |
| ENSG00000127540 | 8,0144  |                |
| ENSG00000131143 | 15,0000 |                |
| ENSG00000131174 | -0,1160 |                |
| ENSG00000135220 | 0,0128  |                |
| ENSG00000135940 | 20,0000 |                |
| ENSG00000139505 | -0,0429 |                |
| ENSG00000140598 | 0,0292  |                |
| ENSG00000140740 | 15,0000 |                |
| ENSG00000141446 | 0,1746  |                |
| ENSG00000142046 | 0,0045  |                |
| ENSG00000152463 | 20,0000 |                |
| ENSG00000152642 | 15,0000 |                |
| ENSG00000155380 | 15,0000 |                |
| ENSG00000156467 | 0,6927  |                |
| ENSG00000156508 | -0,1603 |                |
| ENSG00000156885 | -3,0846 |                |
| ENSG00000156973 | 0,2023  |                |
| ENSG00000158296 | 15,0000 |                |
| ENSG00000158865 | -8,0000 |                |
| ENSG00000160190 | 15,0000 |                |
| ENSG00000160471 | 10,0000 |                |
| ENSG00000161281 | -3,3511 |                |
| ENSG00000164919 | 20,0000 |                |
| ENSG00000165029 | 0,8731  |                |
| ENSG00000165996 | -0,4397 | KEGG ID:R07764 |
| ENSG00000167325 | -8,0000 |                |
| ENSG00000167658 | 10,0000 |                |
| ENSG00000169021 | 6,0894  |                |
| ENSG00000169100 | -0,9951 |                |
| ENSG00000169359 | 0,7316  |                |
| ENSG00000170385 | 10,0000 |                |
| ENSG00000170516 | -0,0085 |                |
| ENSG00000171320 | 0,0329  |                |
| ENSG00000171848 | -4,4222 |                |
| ENSG00000172197 | 0,0000  |                |
| ENSG00000173610 | 0,6157  |                |
| ENSG00000173660 | -2,2642 |                |
| ENSG00000176340 | 6,4774  |                |
| ENSG00000177646 | 0,0148  |                |

|                 |         |                 |
|-----------------|---------|-----------------|
| ENSG00000178537 | 20,0000 | TCDB:2.A.29.8.3 |
| ENSG00000178741 | 15,0000 |                 |
| ENSG00000184076 | 3,3348  |                 |
| ENSG00000184210 | 10,0000 |                 |
| ENSG00000185633 | -0,1550 |                 |
| ENSG00000186792 | -0,1046 |                 |
| ENSG00000187581 | -8,0000 |                 |
| ENSG00000187758 | 20,0000 |                 |
| ENSG00000188687 | 0,0961  |                 |
| ENSG00000196517 | 10,0000 |                 |
| ENSG00000197977 | 0,3847  |                 |
| ENSG00000206527 | 10,0000 | KEGG ID:R07764  |
| ENSG00000215151 | 0,4151  |                 |
| ENSG00000221988 | 2,1999  |                 |
