# Supplementary material for: Reconstruction of Genome-Scale Active Metabolic Networks for 69 Human Cell Types and 16 Cancer Types Using INIT
Source: PubMed Central journal article supplement (PMC3355067; doi:10.1371/journal.pcbi.1002518), 2012-05-17
Supplement: pcbi.1002518.s005.pdf [file pcbi.1002518.s005.pdf]

**Table S3.** Investigation of the 76 genes that were removed during the pre-processing steps. 76 genes which were present in both HepatoNet1 and the HMR database were removed in order to get a fully connected input network for the INIT algorithm. This table summarizes which genes were removed during each of the pre-processing steps (see Table S2 for details).

| Ensembl Gene ID | Score   | HMR | Step 1 | Step 2 | Step 3 | Step 4 |
|-----------------|---------|-----|--------|--------|--------|--------|
| ENSG00000002549 | 20,0000 | ✓   | ✓      | N/A    | N/A    | N/A    |
| ENSG00000005469 | 20,0000 | ✓   | ✓      | ✓      | N/A    | N/A    |
| ENSG00000010256 | 20,0000 | ✓   | ✓      | N/A    | N/A    | N/A    |
| ENSG00000065989 | 20,0000 | ✓   | N/A    | N/A    | N/A    | N/A    |
| ENSG00000072756 | -0,0479 | ✓   | N/A    | N/A    | N/A    | N/A    |
| ENSG00000073417 | 15,0000 | ✓   | ✓      | N/A    | N/A    | N/A    |
| ENSG00000074410 | 10,0000 | ✓   | ✓      | ✓      | N/A    | N/A    |
| ENSG00000095321 | 10,0000 | ✓   | ✓      | ✓      | ✓      | N/A    |
| ENSG00000100092 | -8,0000 | ✓   | ✓      | N/A    | N/A    | N/A    |
| ENSG00000100294 | 1,0765  | ✓   | ✓      | N/A    | N/A    | N/A    |
| ENSG00000100354 | -8,0000 | ✓   | ✓      | N/A    | N/A    | N/A    |
| ENSG00000102032 | -8,0000 | ✓   | ✓      | ✓      | N/A    | N/A    |
| ENSG00000102575 | -8,0000 | ✓   | ✓      | ✓      | N/A    | N/A    |
| ENSG00000104267 | 15,0000 | ✓   | ✓      | ✓      | N/A    | N/A    |
| ENSG00000105650 | 0,2029  | ✓   | N/A    | N/A    | N/A    | N/A    |
| ENSG00000107159 | -8,0000 | ✓   | ✓      | ✓      | N/A    | N/A    |
| ENSG00000111684 | 0,6493  | ✓   | ✓      | ✓      | N/A    | N/A    |
| ENSG00000111726 | -0,1097 | ✓   | ✓      | ✓      | ✓      | N/A    |
| ENSG00000113231 | -0,0805 | ✓   | N/A    | N/A    | N/A    | N/A    |
| ENSG00000113448 | 0,4340  | ✓   | N/A    | N/A    | N/A    | N/A    |
| ENSG00000114021 | 1,7586  | ✓   | ✓      | N/A    | N/A    | N/A    |
| ENSG00000114054 | 1,7888  | ✓   | ✓      | ✓      | ✓      | N/A    |
| ENSG00000115252 | 20,0000 | ✓   | ✓      | N/A    | N/A    | N/A    |
| ENSG00000115944 | 1,6733  | ✓   | ✓      | N/A    | N/A    | N/A    |
| ENSG00000118094 | 0,2086  | ✓   | ✓      | ✓      | N/A    | N/A    |
| ENSG00000118298 | 15,0000 | ✓   | ✓      | ✓      | N/A    | N/A    |
| ENSG00000120437 | 20,0000 | ✓   | ✓      | N/A    | N/A    | N/A    |
| ENSG00000123360 | 10,0000 | ✓   | ✓      | N/A    | N/A    | N/A    |
| ENSG00000124713 | 20,0000 | ✓   | ✓      | N/A    | N/A    | N/A    |
| ENSG00000125877 | 15,0000 | ✓   | ✓      | N/A    | N/A    | N/A    |
| ENSG00000131055 | -8,0000 | ✓   | ✓      | N/A    | N/A    | N/A    |
| ENSG00000131238 | 20,0000 | ✓   | ✓      | N/A    | N/A    | N/A    |
| ENSG00000131686 | -8,0000 | ✓   | ✓      | ✓      | N/A    | N/A    |
| ENSG00000132746 | 0,3473  | ✓   | N/A    | N/A    | N/A    | N/A    |
| ENSG00000133256 | 1,0051  | ✓   | N/A    | N/A    | N/A    | N/A    |
| ENSG00000133742 | 15,0000 | ✓   | ✓      | ✓      | N/A    | N/A    |
| ENSG00000134575 | 11,9207 | ✓   | ✓      | ✓      | N/A    | N/A    |

|                 |         |   |     |     |     |     |
|-----------------|---------|---|-----|-----|-----|-----|
| ENSG00000138030 | 20,000  | ✓ | ✓   | ✓   | N/A | N/A |
| ENSG00000138356 | 3,0597  | ✓ | ✓   | ✓   | N/A | N/A |
| ENSG00000138735 | 15,000  | ✓ | N/A | N/A | N/A | N/A |
| ENSG00000139053 | -4,7002 | ✓ | N/A | N/A | N/A | N/A |
| ENSG00000139684 | 4,6124  | ✓ | ✓   | ✓   | ✓   | N/A |
| ENSG00000142513 | 0,0781  | ✓ | N/A | N/A | N/A | N/A |
| ENSG00000145284 | -0,2561 | ✓ | ✓   | ✓   | N/A | N/A |
| ENSG00000152270 | 15,000  | ✓ | ✓   | N/A | N/A | N/A |
| ENSG00000154678 | -0,0267 | ✓ | N/A | N/A | N/A | N/A |
| ENSG00000157353 | 0,0536  | ✓ | ✓   | ✓   | N/A | N/A |
| ENSG00000159348 | 20,000  | ✓ | ✓   | N/A | N/A | N/A |
| ENSG00000162551 | 20,000  | ✓ | ✓   | ✓   | N/A | N/A |
| ENSG00000163283 | -4,3278 | ✓ | ✓   | ✓   | N/A | N/A |
| ENSG00000163286 | -8,000  | ✓ | ✓   | ✓   | N/A | N/A |
| ENSG00000163295 | 0,1013  | ✓ | ✓   | ✓   | N/A | N/A |
| ENSG00000164405 | 9,3504  | ✓ | ✓   | N/A | N/A | N/A |
| ENSG00000164879 | -8,000  | ✓ | ✓   | ✓   | N/A | N/A |
| ENSG00000167434 | 10,000  | ✓ | ✓   | ✓   | N/A | N/A |
| ENSG00000168748 | 0,7054  | ✓ | ✓   | ✓   | N/A | N/A |
| ENSG00000169239 | 20,000  | ✓ | ✓   | ✓   | N/A | N/A |
| ENSG00000171298 | 1,7621  | ✓ | ✓   | ✓   | N/A | N/A |
| ENSG00000171408 | 10,000  | ✓ | N/A | N/A | N/A | N/A |
| ENSG00000172572 | -8,000  | ✓ | N/A | N/A | N/A | N/A |
| ENSG00000172955 | 13,3880 | ✓ | N/A | N/A | N/A | N/A |
| ENSG00000173599 | 4,3108  | ✓ | ✓   | ✓   | ✓   | N/A |
| ENSG00000174990 | 0,000   | ✓ | ✓   | ✓   | N/A | N/A |
| ENSG00000175198 | 0,8342  | ✓ | ✓   | ✓   | ✓   | N/A |
| ENSG00000178538 | 10,000  | ✓ | ✓   | ✓   | N/A | N/A |
| ENSG00000179091 | 15,000  | ✓ | ✓   | N/A | N/A | N/A |
| ENSG00000181915 | 0,6908  | ✓ | ✓   | ✓   | ✓   | N/A |
| ENSG00000183828 | -0,0390 | ✓ | N/A | N/A | N/A | N/A |
| ENSG00000184254 | -2,1638 | ✓ | N/A | N/A | N/A | N/A |
| ENSG00000184588 | -8,000  | ✓ | N/A | N/A | N/A | N/A |
| ENSG00000185527 | 0,1613  | ✓ | N/A | N/A | N/A | N/A |
| ENSG00000186642 | 15,000  | ✓ | N/A | N/A | N/A | N/A |
| ENSG00000198099 | 15,000  | ✓ | ✓   | N/A | N/A | N/A |
| ENSG00000205268 | 10,000  | ✓ | ✓   | N/A | N/A | N/A |
| ENSG00000205560 | 10,000  | ✓ | ✓   | ✓   | N/A | N/A |
| ENSG00000214013 | 15,000  | ✓ | ✓   | ✓   | ✓   | N/A |

✓ : Available, N/A: Not Available
