# Supplementary material for: Reconstruction of Genome-Scale Active Metabolic Networks for 69 Human Cell Types and 16 Cancer Types Using INIT
Source: PubMed Central journal article supplement (PMC3355067; doi:10.1371/journal.pcbi.1002518), 2012-05-17
Supplement: pcbi.1002518.s006.pdf [file pcbi.1002518.s006.pdf]

**Table S4.** Investigation of the 105 genes which are present in HepatoNet1 but missing in *iHepatocyte1154* due to the INIT algorithm. The 105 missing genes were associated with 182 reactions in HepatoNet1, of which 5 metabolic reactions are related to the sinusoidal space compartment. 108 metabolic reactions existed in *iHepatocyte1154* with different gene or no gene association and 69 (60 unique) reactions are absent in *iHepatocyte1154* due to INIT algorithm. KEGG reaction identifiers are provided for the missing associated reactions to the genes.

| Color code | Explanation                                                                                                           |
|------------|-----------------------------------------------------------------------------------------------------------------------|
| Yellow     | Liver specific sinusoidal space related reactions                                                                     |
| Red        | The associated reactions are present in HMR, but absent in <i>iHepatocyte1154</i> due to the INIT algorithm           |
| Green      | At least one of the associated reaction is present in <i>iHepatocyte1154</i> , but under the control of other gene(s) |

| Ensembl Gene ID | Color Code                                     |
|-----------------|------------------------------------------------|
| ENSG00000001630 | R05640                                         |
| ENSG00000002726 |                                                |
| ENSG00000005381 |                                                |
| ENSG00000007350 | R01067, R01641                                 |
| ENSG00000014257 |                                                |
| ENSG00000026652 | R07762                                         |
| ENSG00000038274 |                                                |
| ENSG00000049860 | R00022                                         |
| ENSG00000062485 | R00351                                         |
| ENSG00000065154 | R00667                                         |
| ENSG00000065911 |                                                |
| ENSG00000067057 | R00769, R01843, R03237, R03239                 |
| ENSG00000067064 |                                                |
| ENSG00000067225 | R00200, R00430, R00572, R00659, R01138, R01858 |
| ENSG00000070669 |                                                |
| ENSG00000078070 | R04138                                         |
| ENSG00000081760 | R01357, R01357                                 |
| ENSG00000089250 | R00111, R00557, R00558                         |
| ENSG00000097021 |                                                |
| ENSG00000100288 | R01021, R01468                                 |
| ENSG00000100596 |                                                |
| ENSG00000101210 |                                                |
| ENSG00000101911 | R01049                                         |
| ENSG00000102144 | R01512                                         |
| ENSG00000102172 |                                                |
| ENSG00000103024 |                                                |

|                 |                                                        |
|-----------------|--------------------------------------------------------|
| ENSG00000105679 | R01061                                                 |
| ENSG00000106348 |                                                        |
| ENSG00000109107 |                                                        |
| ENSG00000110717 | R02163                                                 |
| ENSG00000111674 |                                                        |
| ENSG00000111716 | R00703                                                 |
| ENSG00000111732 |                                                        |
| ENSG00000112972 |                                                        |
| ENSG00000113552 | R00765                                                 |
| ENSG00000115159 |                                                        |
| ENSG00000116981 |                                                        |
| ENSG00000119421 | R02163                                                 |
| ENSG00000120137 | R02971, R03018, R04391                                 |
| ENSG00000121281 |                                                        |
| ENSG00000122643 |                                                        |
| ENSG00000125356 | R02163                                                 |
| ENSG00000125779 | R02971, R03018, R04391                                 |
| ENSG00000128683 |                                                        |
| ENSG00000131459 |                                                        |
| ENSG00000131844 | R04138                                                 |
| ENSG00000132518 |                                                        |
| ENSG00000133731 |                                                        |
| ENSG00000136143 | R00405                                                 |
| ENSG00000138801 | R00509                                                 |
| ENSG00000139163 | R01468                                                 |
| ENSG00000139180 | R02163                                                 |
| ENSG00000140057 |                                                        |
| ENSG00000140287 | R01167                                                 |
| ENSG00000141401 |                                                        |
| ENSG00000141934 | R06520                                                 |
| ENSG00000143179 | R00513, R02372, R00964, R02332                         |
| ENSG00000143199 |                                                        |
| ENSG00000143627 | R00200, R00430, R00572, R00659, R01138, R01858, R01010 |
| ENSG00000143727 |                                                        |
| ENSG00000143845 | R01468                                                 |
| ENSG00000144362 | R00173                                                 |
| ENSG00000147224 | R01049                                                 |
| ENSG00000147684 | R02163                                                 |
| ENSG00000149925 |                                                        |
| ENSG00000151376 |                                                        |
| ENSG00000152254 |                                                        |
| ENSG00000152782 | R02971, R03018, R04391                                 |
| ENSG00000153574 |                                                        |

|                 |                                                |
|-----------------|------------------------------------------------|
| ENSG00000154930 | R00235, R00236, R00316, R00925, R00926, R01354 |
| ENSG00000160191 |                                                |
| ENSG00000160209 | R00174                                         |
| ENSG00000160211 |                                                |
| ENSG00000163082 | R06520                                         |
| ENSG00000163114 |                                                |
| ENSG00000163281 | R00765                                         |
| ENSG00000163655 | R01230, R01231                                 |
| ENSG00000163738 |                                                |
| ENSG00000164039 |                                                |
| ENSG00000164708 | R01518                                         |
| ENSG00000164867 | R00111, R00557, R00558                         |
| ENSG00000166796 | R00703                                         |
| ENSG00000167419 |                                                |
| ENSG00000168032 |                                                |
| ENSG00000168393 | R02094, R02098                                 |
| ENSG00000168653 | R02163                                         |
| ENSG00000168710 |                                                |
| ENSG00000170950 | R01512                                         |
| ENSG00000171989 | R00703                                         |
| ENSG00000172340 | R00405                                         |
| ENSG00000172954 | R07762                                         |
| ENSG00000173175 |                                                |
| ENSG00000176153 |                                                |
| ENSG00000176454 | R07762                                         |
| ENSG00000179087 | R00028, R00801                                 |
| ENSG00000182054 |                                                |
| ENSG00000183696 |                                                |
| ENSG00000184752 | R02163                                         |
| ENSG00000189043 | R02163                                         |
| ENSG00000196475 |                                                |
| ENSG00000197217 |                                                |
| ENSG00000197594 | R00160, R03036, R00287                         |
| ENSG00000198610 | R04819, R04825                                 |
| ENSG00000198931 | R00190, R01229, R00190                         |
| ENSG00000229937 | R01049                                         |
