# Supplementary material for: Reconstruction of Genome-Scale Active Metabolic Networks for 69 Human Cell Types and 16 Cancer Types Using INIT
Source: PubMed Central journal article supplement (PMC3355067; doi:10.1371/journal.pcbi.1002518), 2012-05-17
Supplement: pcbi.1002518.s008.pdf [file pcbi.1002518.s008.pdf]

**Table S6.** List of genes for which their corresponding reactions were significantly more present in cancer tissues compared to their corresponding normal tissues (p-value < 10e-4).

| Ensembl Gene ID |
|-----------------|
| ENSG00000177156 |
| ENSG00000137825 |
| ENSG00000102780 |
| ENSG00000111339 |
| ENSG00000136143 |
| ENSG00000069943 |
| ENSG00000161031 |
| ENSG00000135423 |
| ENSG00000167261 |
| ENSG00000167261 |
| ENSG00000175505 |
| ENSG00000184752 |
| ENSG00000090013 |
| ENSG00000124767 |
| ENSG00000114480 |
| ENSG00000114480 |
| ENSG00000111885 |
| ENSG00000158008 |
| ENSG00000036530 |
| ENSG00000153574 |
