# Supplementary material for: Reconstruction of Genome-Scale Active Metabolic Networks for 69 Human Cell Types and 16 Cancer Types Using INIT
Source: PubMed Central journal article supplement (PMC3355067; doi:10.1371/journal.pcbi.1002518), 2012-05-17
Supplement: pcbi.1002518.s009.pdf [file pcbi.1002518.s009.pdf]

**Table S7.** List of Reporter Metabolites (p-value < 10e-4)

| Metabolite Name[compartment]                                         |
|----------------------------------------------------------------------|
| Isopentenyl diphosphate[cytosol]                                     |
| di-trans,poly-cis-Decaprenyl diphosphate[cytosol]                    |
| all-trans-Hexaprenyl diphosphate[cytosol]                            |
| all-trans-Heptaprenyl diphosphate[cytosol]                           |
| all-trans-Octaprenyl diphosphate[cytosol]                            |
| all-trans-Nonaprenyl diphosphate[cytosol]                            |
| all-trans-Pentaprenyl diphosphate[cytosol]                           |
| Geranylgeranyl diphosphate[cytosol]                                  |
| H2O2[extracellular]                                                  |
| spermidine monoaldehyde 2[extracellular]                             |
| spermidine monoaldehyde 1[extracellular]                             |
| Phenethylamine[peroxisomes]                                          |
| spermine monoaldehyde[extracellular]                                 |
| Reduced riboflavin[cytosol]                                          |
| Cerebrosterol[cytosol]                                               |
| Oxygen[extracellular]                                                |
| spermidine dialdehyde[extracellular]                                 |
| 1-Methylpyrrolinium[extracellular]                                   |
| 5-Aminopentanal[extracellular]                                       |
| Cadaverine[extracellular]                                            |
| N-Methylputrescine[extracellular]                                    |
| NH4+[extracellular]                                                  |
| NH3[peroxisomes]                                                     |
| 2-Acyl-sn-glycero-3-phosphoethanolamine[extracellular]               |
| glycerophosphoserine[extracellular]                                  |
| Tyramine[peroxisomes]                                                |
| Diphosphate[cytosol]                                                 |
| Spermidine[extracellular]                                            |
| trans,trans-Farnesyl diphosphate[cytosol]                            |
| 5-oxo-12(S)-hydroxy-eicosa-2E,8E,10E,14Z-tetraenoyl-CoA[peroxisomes] |
| Imidazole-4-acetaldehyde[extracellular]                              |
| timnodonate[peroxisomes]                                             |
| Reduced FMN[cytosol]                                                 |
| sn-glycero-3-Phosphoethanolamine[extracellular]                      |
| sn-glycero-3-Phosphocholine[extracellular]                           |
| N-Acetyl-D-muramoate[extracellular]                                  |
| N-Acetylmuramoyl-Ala[extracellular]                                  |
| NH3[extracellular]                                                   |
| spermine dialdehyde[extracellular]                                   |
| Bilirubin[extracellular]                                             |
| 1-Acyl-sn-glycero-3-phosphoethanolamine[lysosomes]                   |

|                                                                                                                    |
|--------------------------------------------------------------------------------------------------------------------|
| 6-Lactoyl-5,6,7,8-tetrahydropterin[cytosol]                                                                        |
| leukotriene-E4[cytosol]                                                                                            |
| beta-D-Glucuronosyl-(1->4)-N-acetyl-alpha-D-glucosaminylproteoglycan[cytosol]                                      |
| N-Acetyl-alpha-D-glucosaminyl-(1->4)-beta-D-glucuronosyl-(1->4)-N-acetyl-alpha-D-glucosaminylproteoglycan[cytosol] |
| 2-Amino-4-hydroxy-6-(erythro-1,2,3-trihydroxypropyl)dihydropteridine triphosphate[mitochondria]                    |
| Bilirubin[cytosol]                                                                                                 |
| Biliverdin[cytosol]                                                                                                |
| (2S)-2-Methylacyl-CoA[peroxisomes]                                                                                 |
| (2R)-2-Methylacyl-CoA[peroxisomes]                                                                                 |
| Aminoacetone[cytosol]                                                                                              |
| Aminoacetone[peroxisomes]                                                                                          |
| L-2-Amino-3-oxobutanoic acid[cytosol]                                                                              |
| quinonoid dihydrobiopterin[nucleus]                                                                                |
| O2'-4a-cyclic-tetrahydrobiopterin[nucleus]                                                                         |
| tetrahydrobiopterin-4a-carbinolamine[nucleus]                                                                      |
| Chondroitin 4-sulfate[cytosol]                                                                                     |
| Dimethylallyl diphosphate[peroxisomes]                                                                             |
| 4-Hydroxyphenylacetaldehyde[peroxisomes]                                                                           |
| 7-Dehydrodesmosterol[cytosol]                                                                                      |
| D-myo-Inositol 3,4-bisphosphate[cytosol]                                                                           |
| Fatty acid[extracellular]                                                                                          |
| Alprostadiol[nucleus]                                                                                              |
| 1,3-Diaminopropane[extracellular]                                                                                  |
| 3-Aminopropanal[extracellular]                                                                                     |
| Phenylacetaldehyde[peroxisomes]                                                                                    |
| 1-Acyl-sn-glycero-3-phosphocholine[lysosomes]                                                                      |
| 1,4-benzothiazine-o-quinonimine[cytosol]                                                                           |
| Triphosphate[mitochondria]                                                                                         |
| Spermine[extracellular]                                                                                            |
| Methylglyoxal[peroxisomes]                                                                                         |
| (5Z)-(15S)-11alpha-Hydroxy-9,15-dioxoprostanoate[cytosol]                                                          |
| prostaglandin H1[nucleus]                                                                                          |
