# Supplementary material for: Reconstruction of Genome-Scale Active Metabolic Networks for 69 Human Cell Types and 16 Cancer Types Using INIT
Source: PubMed Central journal article supplement (PMC3355067; doi:10.1371/journal.pcbi.1002518), 2012-05-17
Supplement: pcbi.1002518.s010.pdf [file pcbi.1002518.s010.pdf]

**Table S8.** Versions of the databases used in the creation of the Human Metabolic Reaction database (HMR).

| Database   | Export format   | Version       | Downloaded from                                                                     |
|------------|-----------------|---------------|-------------------------------------------------------------------------------------|
| Recon 1    | Flat file, SBML | Jan 31, 2008  | <a href="http://bigg.ucsd.edu/">http://bigg.ucsd.edu/</a>                           |
| EHMN       | Excel           | June 6, 2009  |                                                                                     |
| HumanCyc   | Flat file       | 12.5          | <a href="http://biocyc.org/download.shtml">http://biocyc.org/download.shtml</a>     |
| KEGG       | Flat file, KGML | 48            | <a href="ftp://ftp.genome.jp/pub/kegg/">ftp://ftp.genome.jp/pub/kegg/</a> *         |
| HPA        | Flat file       | 7.1           | <a href="http://www.proteinatlas.org/">http://www.proteinatlas.org/</a>             |
| HMDB       | Flat file       | 2.4           | <a href="http://www.hmdb.ca/">http://www.hmdb.ca/</a>                               |
| BioGPS     | Flat file       | 2.0           | <a href="http://www.biogps.org/">http://www.biogps.org/</a>                         |
| HepatoNet1 | Flat file       | March 1, 2011 | <a href="http://www.nature.com/msb/journal/">http://www.nature.com/msb/journal/</a> |

\*The KEGG FTP has moved to <http://www.bioinformatics.jp> and requires a subscription.
