# Supplementary material for: Reconstruction of Genome-Scale Active Metabolic Networks for 69 Human Cell Types and 16 Cancer Types Using INIT
Source: PubMed Central journal article supplement (PMC3355067; doi:10.1371/journal.pcbi.1002518), 2012-05-17
Supplement: pcbi.1002518.s012.pdf [file pcbi.1002518.s012.pdf]

**Table S10.** Comparison between iHuman1512 and some other published human metabolic networks.

|            | Reactions | Metabolites | Genes |
|------------|-----------|-------------|-------|
| iHuman1512 | 5535      | 3397        | 1512  |
| Recon 1    | 3402      | 2785        | 1496  |
| EHMN       | 6216      | 2678        | 2480  |
| HepatoNet1 | 2519      | 777         | 713   |
